# Supplementary material
Source: ML conference proceedings conference paper supplement (https://proceedings.neurips.cc/paper_files/paper/2022/hash/4b74a42fc81fc7ee252f6bcb6e26c8be-Abstract.html)
Supplement: Supplementary file 1 [file 4b74a42fc81fc7ee252f6bcb6e26c8be-Supplemental-Conference.pdf]

---

# Supplementary Material for ACIL: Analytic Class-Incremental Learning with Absolute Memorization and Privacy Protection

---

**Huiping Zhuang<sup>1</sup>, Zhenyu Weng<sup>2\*</sup>, Hongxin Wei<sup>3</sup>, Renchunzi Xie<sup>3</sup>, Kar-Ann Toh<sup>4</sup>, Zhiping Lin<sup>2</sup>**

<sup>1</sup>Shien-Ming Wu School of Intelligent Engineering, South China University of Technology, China

<sup>2</sup>School of Electrical and Electronic Engineering, Nanyang Technological University, Singapore

<sup>3</sup>School of Computer Science and Engineering, Nanyang Technological University, Singapore

<sup>4</sup>Department of Electrical and Electronic Engineering, Yonsei University, Korea

<sup>1</sup>hpzhuang@scut.edu.cn, <sup>2</sup>{zhenyu.weng, ezplin}@ntu.edu.sg

<sup>3</sup>{hongxin001, XIER0002}@e.ntu.edu.sg, <sup>4</sup>kato@yonsei.ac.kr

## 1 Proof of Theorem

*Proof.* We first solves the recursive formulation for the RFAuM  $R_k$ . According to the Woodbury matrix identity, for any invertible square matrices  $A$  and  $C$ , we have

$$(A + UCV)^{-1} = A^{-1} - A^{-1}U(C^{-1} + VA^{-1}U)VA^{-1}.$$

Let  $A = R_{k-1}^{-1}$ ,  $U = X_k^{(fe)T}$ ,  $V = X_k^{(fe)}$ , and  $C = I$ . Hence, from  $R_k = (R_{k-1}^{-1} + X_k^{(fe)T} X_k^{(fe)})^{-1}$  and the Woodbury matrix identity, we have

$$R_k = R_{k-1} - R_{k-1} X_k^{(fe)T} (I + X_k^{(fe)} R_{k-1} X_k^{(fe)T}) X_k^{(fe)} R_{k-1} \quad (a)$$

which completes the proof for the recursive formulation of RFAuM. Let  $Q_{k-1} = [X_0^{(fe)T} Y_0 \dots X_{k-1}^{(fe)T} Y_{k-1}]$ . According to (7), (8) and (a), we have

$$\begin{aligned} \hat{W}_{FCN}^{(k)} &= R_k \begin{bmatrix} Q_{k-1} & X_k^{(fe)T} Y_k^{\text{train}} \end{bmatrix} \\ &= \begin{bmatrix} R_k Q_{k-1} & R_k X_k^{(fe)T} Y_k^{\text{train}} \end{bmatrix} \end{aligned} \quad (b)$$

where

$$\begin{aligned} R_k Q_{k-1} &= R_{k-1} Q_{k-1} - R_{k-1} X_k^{(fe)T} (I + X_k^{(fe)} R_{k-1} X_k^{(fe)T})^{-1} X_k^{(fe)} R_{k-1} Q_{k-1} \\ &= \hat{W}_{FCN}^{(k-1)} - R_{k-1} X_k^{(fe)T} (I + X_k^{(fe)} R_{k-1} X_k^{(fe)T})^{-1} X_k^{(fe)} \hat{W}_{FCN}^{(k-1)}. \end{aligned} \quad (c)$$

Let  $K_k = (I + X_k^{(fe)} R_{k-1} X_k^{(fe)T})^{-1}$ . Since,

$$I = K_k K_k^{-1} = K_k (I + X_k^{(fe)} R_{k-1} X_k^{(fe)T}),$$

we have  $K_k = I - K_k X_k^{(fe)} R_{k-1} X_k^{(fe)T}$ . Therefore,

$$\begin{aligned} R_{k-1} X_k^{(fe)T} (I + X_k^{(fe)} R_{k-1} X_k^{(fe)T})^{-1} &= R_{k-1} X_k^{(fe)T} K_k \\ &= R_{k-1} X_k^{(fe)T} (I - K_k X_k^{(fe)} R_{k-1} X_k^{(fe)T}) \\ &= (R_{k-1} - R_{k-1} K_k X_k^{(fe)} R_{k-1}) X_k^{(fe)T} = R_k X_k^{(fe)T} \end{aligned}$$

which allows (c) to be reduced to

$$R_k Q_{k-1} = \hat{W}_{FCN}^{(k-1)} - R_k X_k^{(fe)T} X_k^{(fe)} \hat{W}_{FCN}^{(k-1)}. \quad (d)$$

By substituting (d) into (b), we complete the proof.  $\square$

---

\*Corresponding author.

## 2 Strict-Memory Setting

Here we also give the average incremental accuracy (see Table A) for the compared methods for strict-memory setting (i.e., only a fixed memory is allowed for the CIL). We adopt the memory budget used in the RMM paper [12]. In details, for each benchmark data, the memory budget is determined according to the phase number  $K$ . For instance [12], on CIFAR-10, the budget is 7k samples for  $K = 5$  (7k samples = 10 classes per phase  $\times$  500 samples per class + 2k samples). The numbers reported in Table A are duplicated from [12] where the compared methods are implemented in the same setting.

The ACIL gives identical results either in growing-exemplar or fixed memory settings. This is because the ACIL does not belong to the branch of replay-based CIL.

Table A: Comparison of average incremental accuracy among compared methods for strict-memory setting.

| Metric        | Method                         | Privacy | CIFAR-100    |              |              |              | ImageNet-Subset |              |              |              | ImageNet-Full |              |              |              |
|---------------|--------------------------------|---------|--------------|--------------|--------------|--------------|-----------------|--------------|--------------|--------------|---------------|--------------|--------------|--------------|
|               |                                |         | K=5          | 10           | 25           | 50           | K=5             | 10           | 25           | 50           | K=5           | 10           | 25           | 50           |
| $\bar{A}(\%)$ | LwF (TPAMI 2018)               | ✓       | 56.79        | 53.05        | 50.44        | -            | 58.83           | 53.60        | 50.16        | -            | 52.00         | 47.87        | 47.49        | -            |
|               | iCaRL (CVPR 2017)              | ×       | 60.48        | 56.04        | 52.07        | -            | 67.33           | 62.42        | 57.04        | -            | 50.57         | 48.27        | 49.44        | -            |
|               | LUCIR (CVPR 2019)              | ×       | 63.34        | 62.47        | 59.69        | -            | 71.21           | 68.21        | 64.15        | -            | 65.16         | 62.34        | 57.37        | -            |
|               | PODNet (ECCV 2020)             | ×       | 64.60        | 63.13        | 61.96        | -            | 76.45           | 74.66        | 70.15        | -            | 66.80         | 64.89        | 60.28        | -            |
|               | LUCIR+Mnemonics (CVPR 2020)    | ×       | 64.59        | 62.59        | 61.02        | -            | 72.60           | 71.66        | 70.52        | -            | 65.40         | 64.02        | 62.05        | -            |
|               | POD+AAANets (CVPR 2021)        | ×       | 66.61        | 64.61        | 62.63        | -            | 77.36           | 75.83        | 72.18        | -            | 67.97         | 65.03        | 62.03        | -            |
|               | POD+AAANets+RMM (NeurIPS 2021) | ×       | <b>68.86</b> | <b>67.61</b> | <b>66.21</b> | -            | <b>79.52</b>    | <b>78.47</b> | <b>76.54</b> | -            | <b>69.21</b>  | <b>67.45</b> | 63.93        | -            |
|               | ACIL                           | ✓       | 66.30        | 66.07        | 65.95        | <b>66.01</b> | 74.81           | 74.76        | 74.59        | <b>74.13</b> | 65.34         | 64.84        | <b>64.63</b> | <b>64.35</b> |
